# Supplementary material
Source: ML conference proceedings conference paper supplement (https://openreview.net/forum?id=0myKAuHN3M)
Supplement: supplementary_material [file attachment]

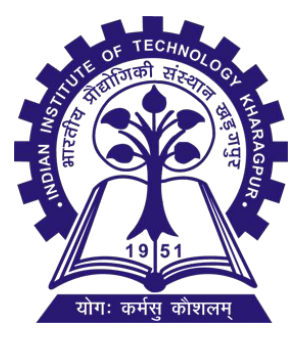

RIT Rochester Institute of Technology

UNIVERSITY OF South Carolina

Meta AWS

# Hierarchical Prompting Taxonomy: A Universal Evaluation Framework for Large Language Models Aligned with Human Cognitive Principles

Devichand Budagam<sup>1</sup>, Ashutosh Kumar<sup>2</sup>, Mahsa Khoshnoodi<sup>3</sup>,  
Sankalp KJ<sup>4</sup>, Vinija Jain<sup>5</sup>, Aman Chadha<sup>6</sup>

<sup>1</sup>Indian Institute of Technology Kharagpur, India <sup>2</sup>Rochester Institute of Technology, USA

<sup>3</sup>Researcher, Fatima Fellowship <sup>4</sup>AI Institute, University of South Carolina, USA

<sup>5</sup>Meta AI, USA, <sup>6</sup>Amazon GenAI USA

KDD2025 August 3-7, 2025

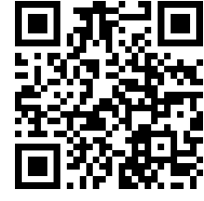

Scan here to check out our paper!

## Introduction & Motivation

Modern evaluations of Large Language Models (LLMs) often rely on surface-level metrics that overlook the depth of reasoning these models can achieve. By drawing inspiration from human cognitive processes, our work introduces the **Hierarchical Prompting Taxonomy (HPT)** and **Hierarchical Prompting Framework (HPF)** to systematically decompose tasks—from basic recall to complex reasoning and knowledge integration. Using the **Hierarchical Prompting Index (HPI)** to quantify cognitive demands, our approach aligns model evaluation with human cognitive principles, enabling adaptive prompting strategies that enhance both performance and interpretability across a range of applications.

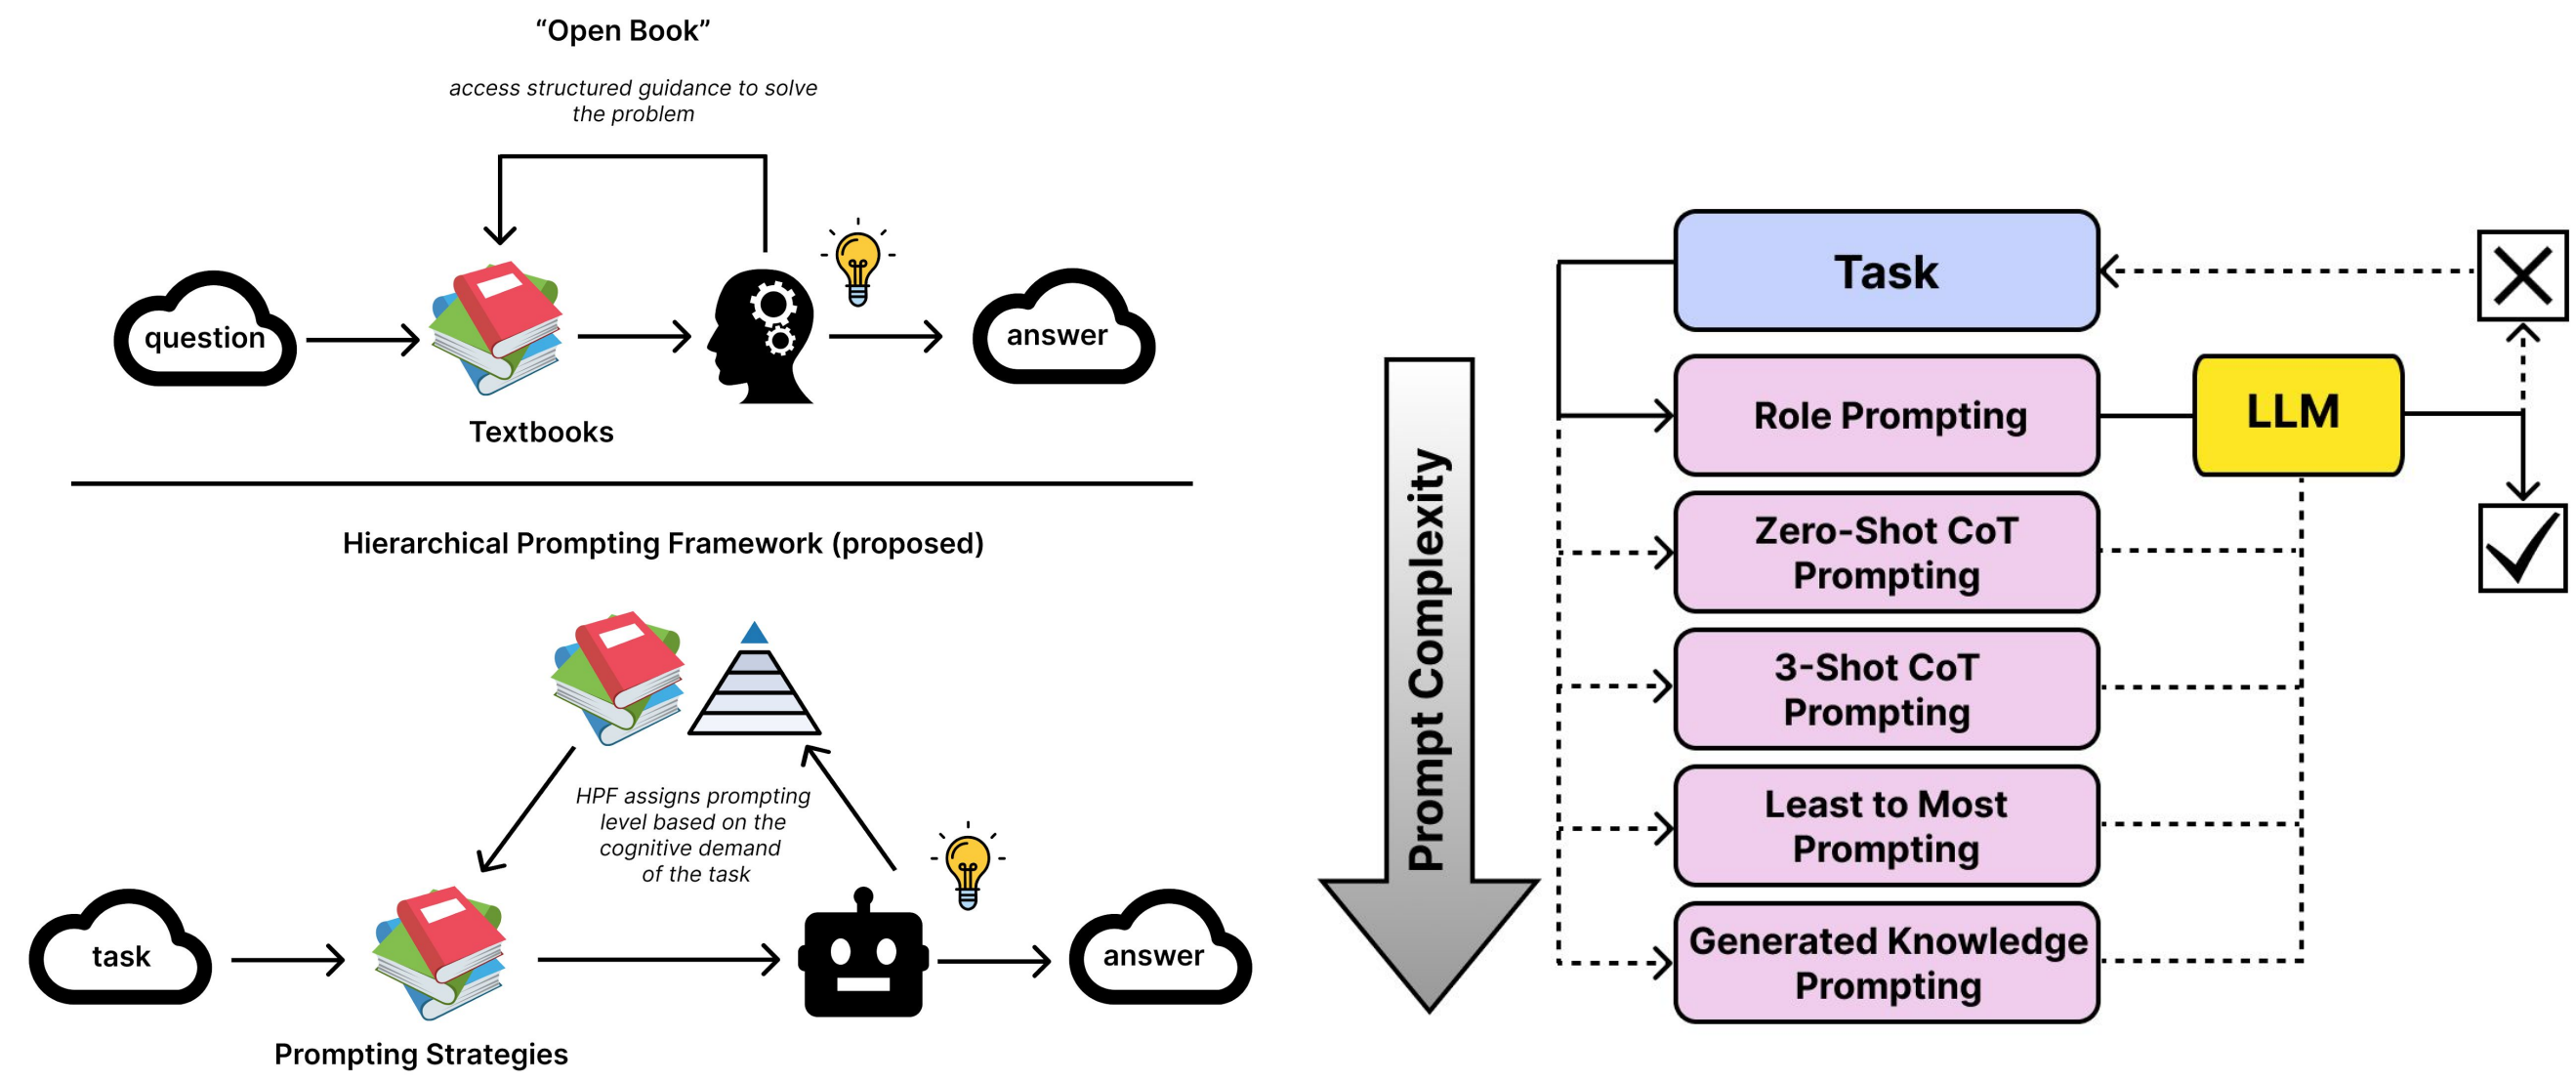

Analogical framework comparing the HPF with "Open Book" examination methodology. The diagram illustrates how HPF components (below) mirror traditional educational assessment elements (above), with parallel relationships between task complexity levels, resource utilization (prompts/textbooks), and performance metrics (HPI/student effort). This comparison demonstrates how LLM task complexity scales similarly to educational assessment complexity, from simple lookup tasks to complex synthesis problems

Hierarchical Prompting Framework includes five distinct prompting strategies, each designed for different levels of task complexity to ensure the appropriate prompt is selected for the given task. A ✓ indicates task completion, while a ✕ signifies task incompleteness.

## Research Questions

- How can HPF be used to match prompt complexity to task cognitive demands, optimizing the trade-off between computational efficiency and performance?
- Under what conditions can strategic prompt selection enable smaller language models to achieve comparable performance to larger models, and how does this relate to task complexity as measured by Hierarchical Prompting Index (HPI)?
- How can the measurements of task cognitive demands through HPI inform model selection and deployment decisions, beyond traditional accuracy metrics?

## Hierarchical Prompting Taxonomy (HPT)

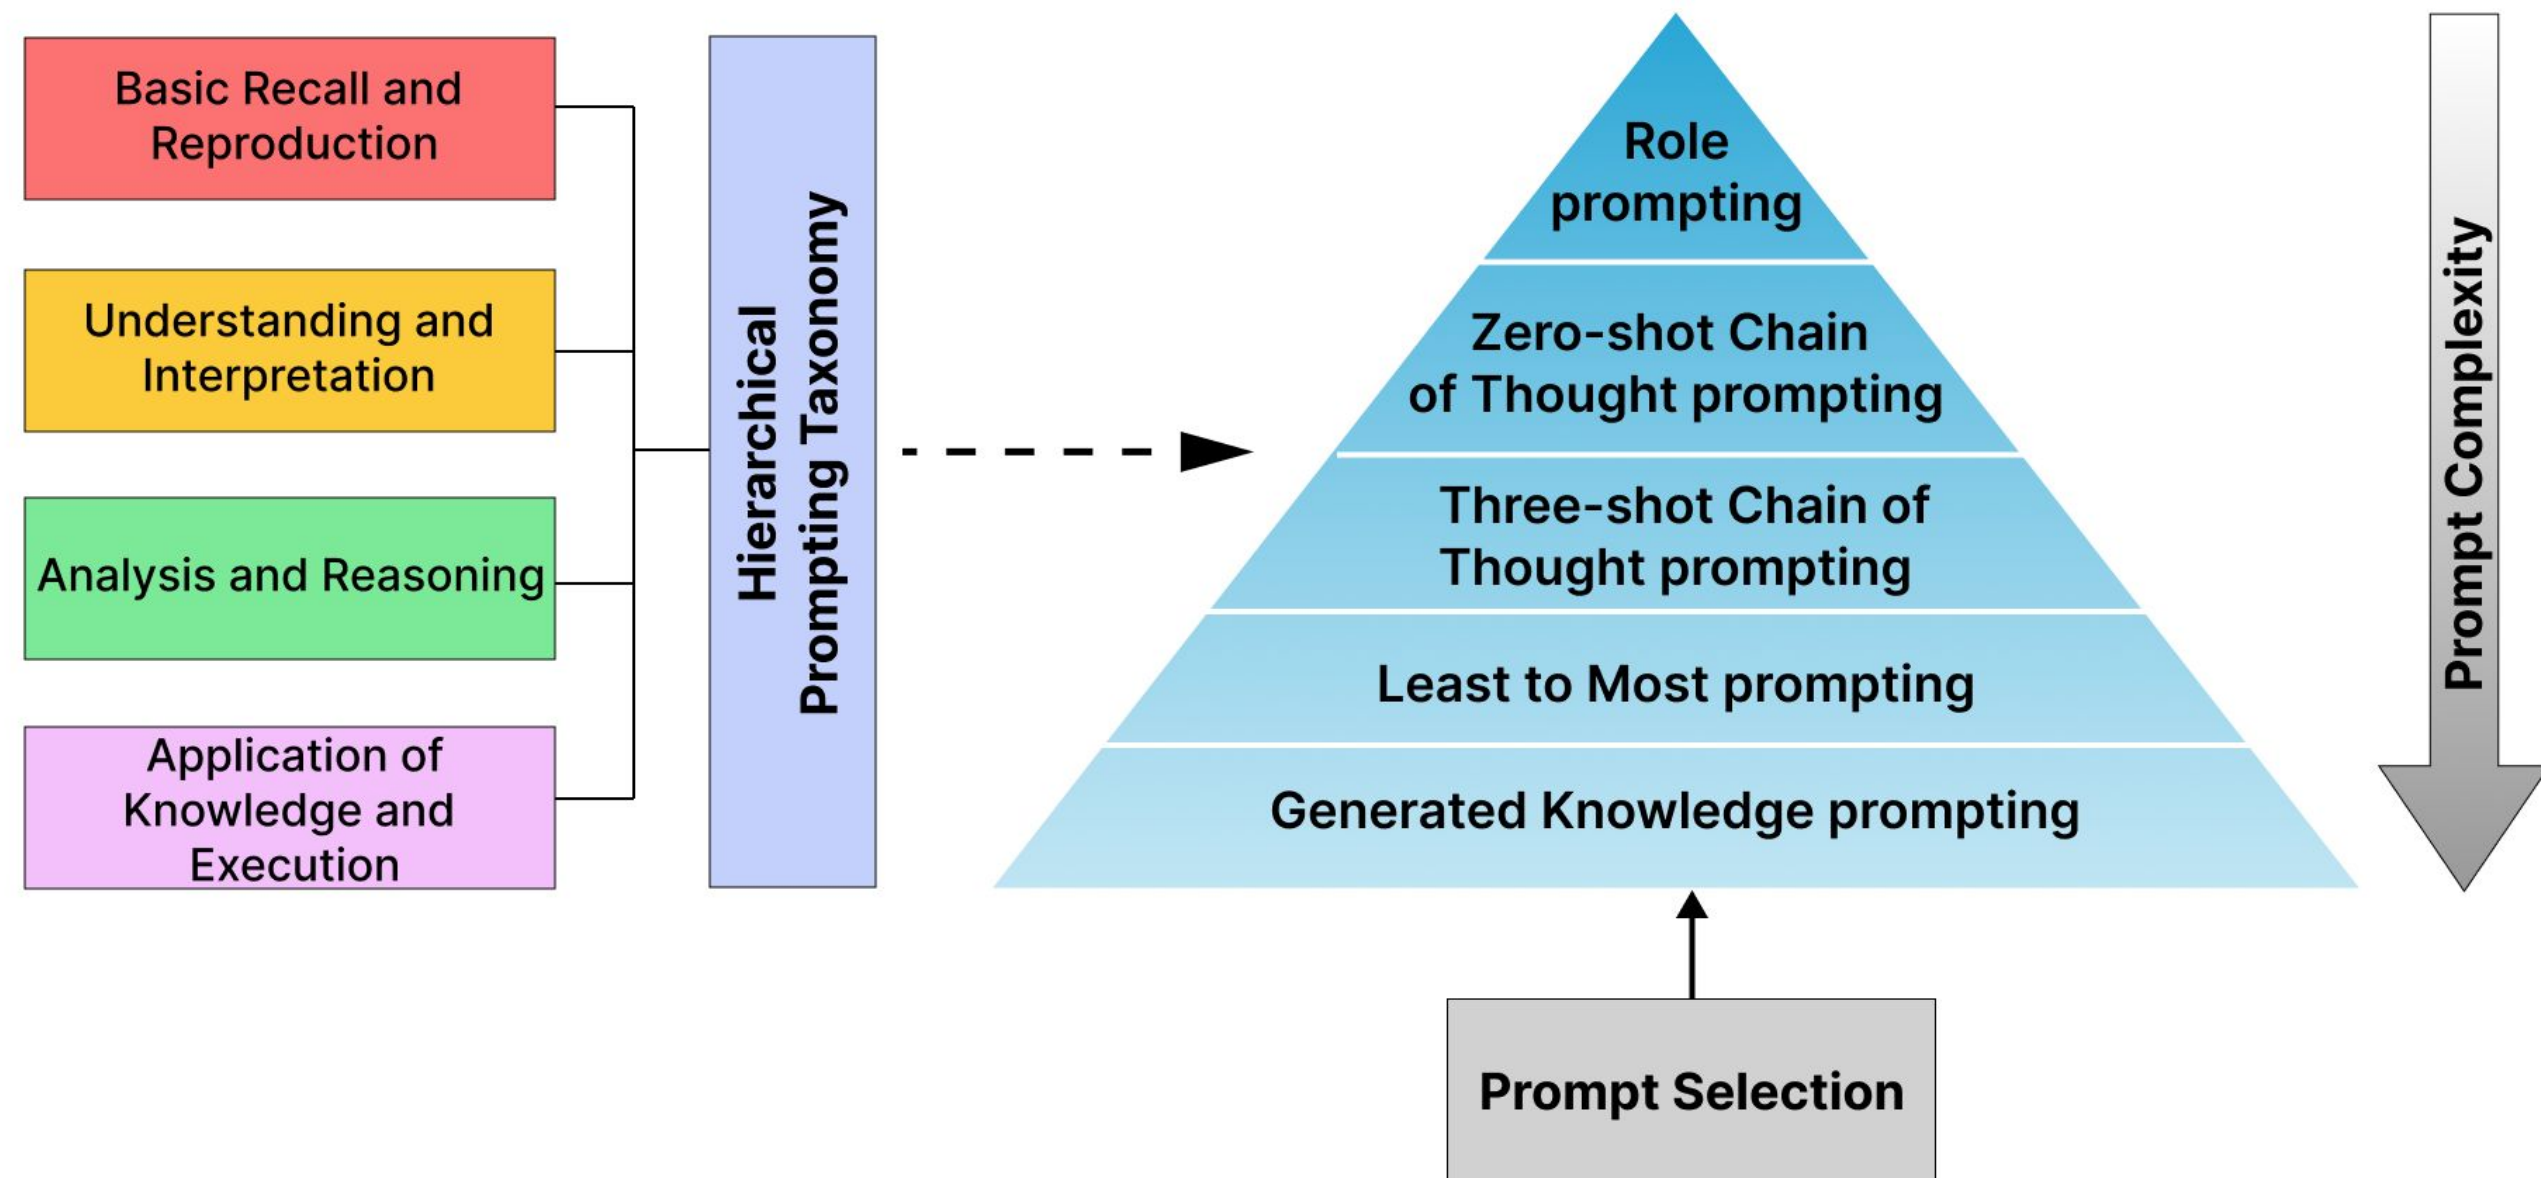

Hierarchical Prompting Taxonomy: A taxonomy designed to assess the complexity of prompting strategies based on the criteria: Basic Recall and Reproduction, Understanding and Interpretation, Analysis and Reasoning, and Application of Knowledge and Reasoning.

## Hierarchical Prompting Framework (HPF)

An operational system that implements HPT by sequentially applying prompting strategies of increasing complexity. HPF progressively challenges a language model to solve tasks, starting with minimal cognitive demands and advancing to multi-step reasoning as needed.

## Hierarchical Prompting Index (HPI)

A metric that quantifies the cognitive effort required by a language model to solve a given task. The HPI is determined by the prompting level at which the model first produces a correct response, with lower values indicating easier tasks and higher values reflecting increased cognitive load (1 being the lowest and 5 being the highest).

### Algorithm 1: HPI Metric

```

HPI_List = []
for sample i in the evaluation dataset do
  for level x in the HPF do
    if LLM resolves the task then
      HPI_List[i] = x
      break
    end if
  end for
  if LLM failed to resolve the task then
    HPI_List[i] = m + HPI_Dataset
  end if
end for
HPI = 1/n Σ HPI_List[j]
```

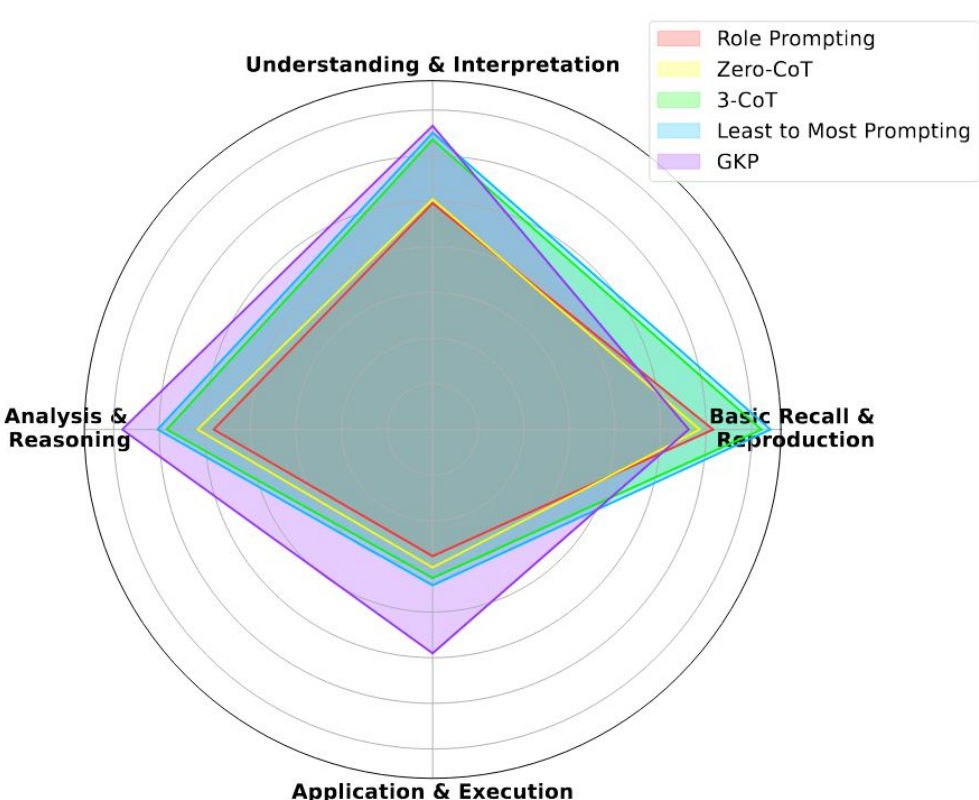

Scoring distribution for each of the four rules of the HPT—Basic Understanding & Reproduction, Understanding & Interpretation, Analysis and Reasoning, Application of Knowledge & Execution for the prompting strategies in the HPF

## Experimental Setup & Evaluation

| Dataset   | Evaluation Set Size | Representative Set Size | HPI <sub>Dataset</sub> |
|-----------|---------------------|-------------------------|------------------------|
| MMLU      | 14500               | 725                     | 3.03                   |
| GSM8k     | 1320                | 66                      | 2.14                   |
| Humaneval | 160                 | 8                       | 4.68                   |
| BoolQ     | 3270                | 162                     | 1.71                   |
| CSQA      | 1221                | 60                      | 2.52                   |
| IWSLT     | 890                 | 45                      | 1.92                   |
| SamSum    | 819                 | 40                      | 2.23                   |

HPI<sub>Dataset</sub> scores across datasets evaluated by human annotators). The table lists the evaluation set size, representative set size, and HPI<sub>Dataset</sub> for various datasets. HPI<sub>Dataset</sub> scores provide a measure of task complexity relative to human annotators.

### Proprietary Models:

GPT-4o, Claude 3.5 Sonnet

### Open-Source Modes:

Gemma 7B, Mistral 7B, Llama-3 8B, Gemma-2 9B, Mistral-Nemo 12B

### Task Categories:

Reasoning, Coding, Mathematics, Question-Answering, Summarization, Machine Translation

## Results

| DATASETS          | MMLU |          | GSM8k |          | BoolQ |          | CSQA |          |
|-------------------|------|----------|-------|----------|-------|----------|------|----------|
|                   | HPI  | Accuracy | HPI   | Accuracy | HPI   | Accuracy | HPI  | Accuracy |
| GPT-4o            | 1.81 | 91.61    | 1.71  | 96.43    | 1.32  | 96.82    | 1.65 | 92.54    |
| Claude 3.5 Sonnet | 1.84 | 92.16    | 1.35  | 97.72    | 1.20  | 99.81    | 2.01 | 86.15    |
| Mistral-Nemo 12B  | 2.45 | 89.75    | 3.01  | 86.80    | 1.75  | 99.87    | 2.06 | 90.17    |
| Gemma-2 9B        | 2.34 | 87.28    | 2.17  | 91.28    | 1.30  | 98.28    | 1.94 | 88.86    |
| Llama-3 8B        | 2.84 | 82.63    | 2.34  | 86.20    | 1.37  | 99.30    | 2.43 | 84.76    |
| Gemma 7B          | 2.93 | 83.31    | 6.70  | 27.88    | 1.45  | 99.42    | 2.50 | 83.78    |
| Mistral 7B        | 2.89 | 81.45    | 5.11  | 46.93    | 1.41  | 98.07    | 2.49 | 82.06    |

HPI (lower is better) and accuracy of LLMs across MMLU, GSM8K, BoolQ, and CSQA datasets. Blue indicates datasets where the LLM with the best HPI does not achieve the best performance. Green indicates the LLM with the maximum number of datasets.

| DATASETS          | IWSLT |      |      |      | SamSum |      |         |      | DATASET           | HumanEval |      |
|-------------------|-------|------|------|------|--------|------|---------|------|-------------------|-----------|------|
|                   | HPI   |      | BLEU |      | HPI    |      | ROUGE-L |      |                   | Models    | HPI  |
| Models            | 0.15  | 0.20 | 0.15 | 0.20 | 0.15   | 0.20 | 0.15    | 0.20 |                   |           |      |
| GPT-4o            | 2.66  | 3.08 | 0.32 | 0.32 | 1.11   | 1.21 | 0.30    | 0.29 | GPT-4o            | 2.25      | 0.95 |
| Claude 3.5 Sonnet | 4.63  | 4.87 | 0.20 | 0.20 | 1.25   | 1.60 | 0.23    | 0.23 | Claude 3.5 Sonnet | 1.04      | 1.00 |
| Mistral-Nemo 12B  | 2.87  | 3.40 | 0.27 | 0.27 | 1.19   | 1.47 | 0.23    | 0.24 | Mistral-Nemo 12B  | 2.07      | 0.96 |
| Gemma-2 9B        | 4.40  | 4.75 | 0.21 | 0.20 | 1.30   | 1.86 | 0.22    | 0.22 | Gemma-2 9B        | 1.01      | 0.91 |
| Llama-3 8B        | 3.40  | 3.92 | 0.24 | 0.23 | 1.30   | 1.72 | 0.22    | 0.22 | Llama-3 8B        | 1.03      | 1.00 |
| Gemma 7B          | 5.39  | 5.84 | 0.08 | 0.09 | 3.31   | 5.03 | 0.11    | 0.10 | Gemma 7B          | 3.71      | 0.79 |
| Mistral 7B        | 3.52  | 4.14 | 0.22 | 0.22 | 1.26   | 1.68 | 0.21    | 0.22 | Mistral 7B        | 1.10      | 0.93 |

HPI (lower is better) and Pass@1 of LLMs on the HumanEval

HPI (lower is better), BLEU score for IWSLT, and ROUGE-L score for SamSum, of LLMs with thresholds.

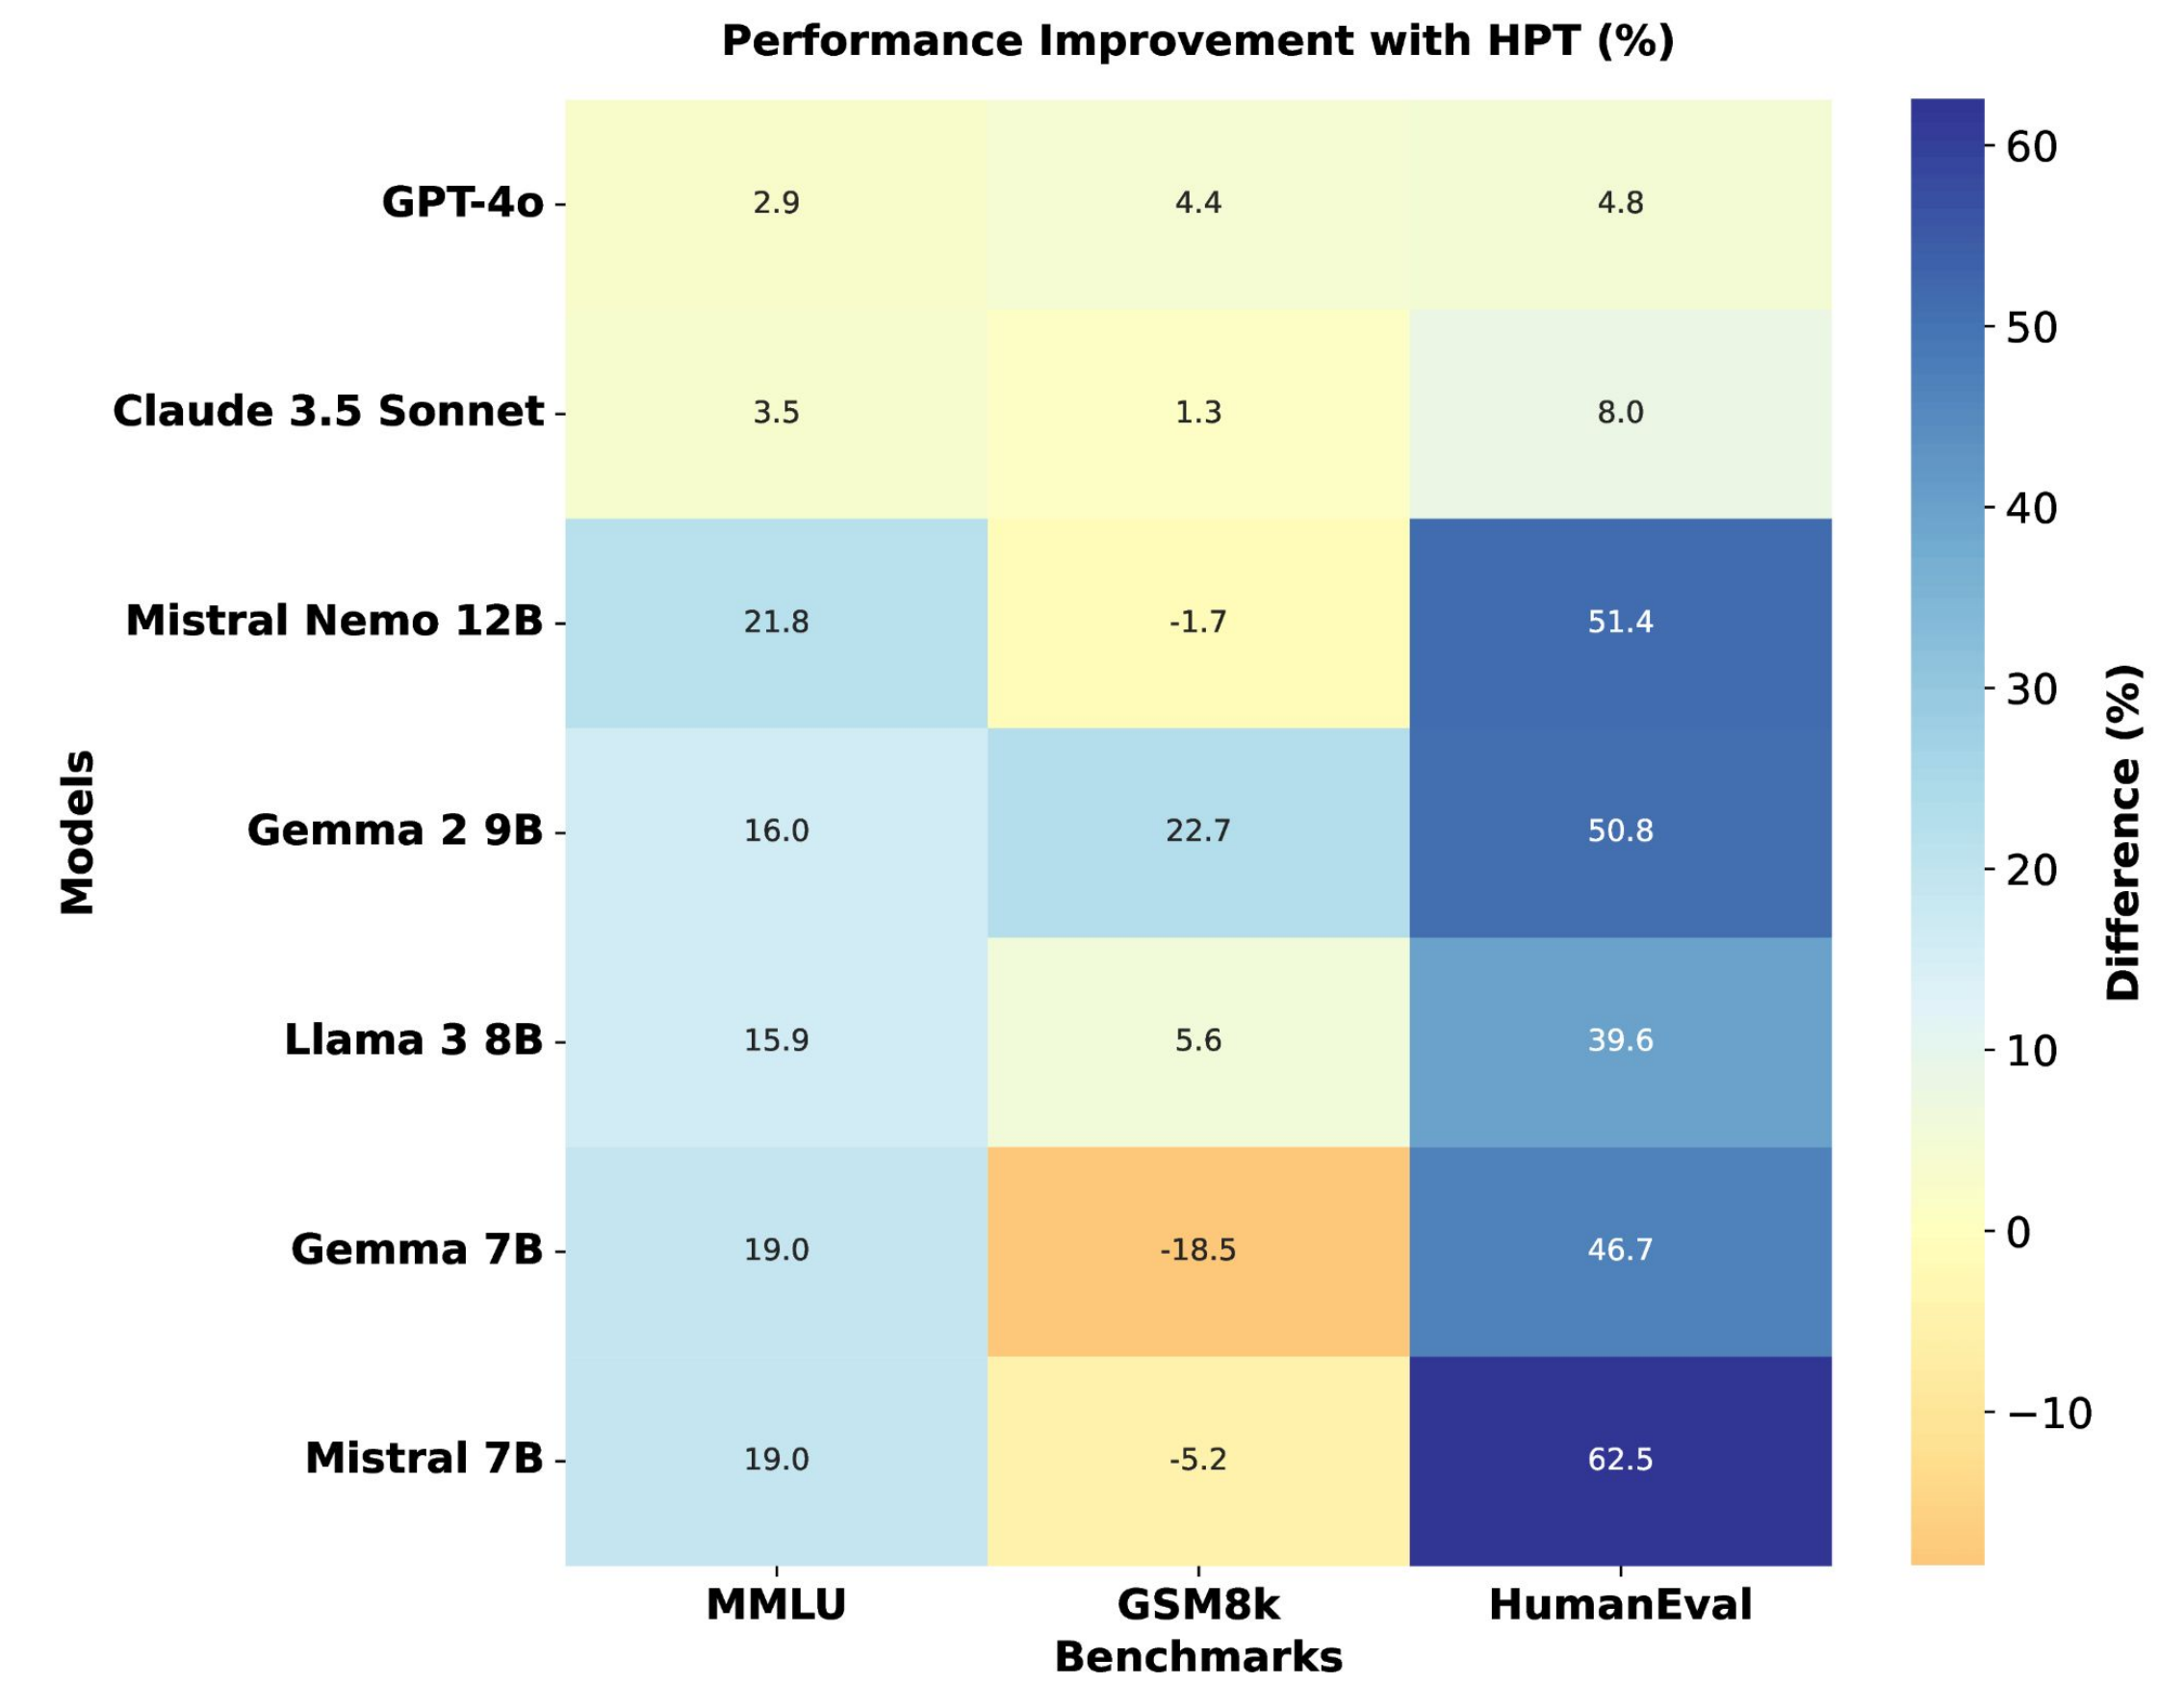

Performance Comparison of HPT-based Evaluation vs. Standard Evaluation: Performance improvements (in %) when using HPT-based evaluation compared to standard evaluation across three benchmarks: MMLU, GSM8k, and HumanEval. Positive values indicate performance gains with HPT, while negative values indicate performance decreases. The baseline standard evaluation scores are sourced from Hugging Face leaderboard and official research reports.

## Discussions

**Cognitive Load-Based Prompt Selection:** HPF improved performance with models showing upto 21.8% improvement on MMLU benchmarks

**Model-Prompt Efficiency Trade-offs:** Enabled smaller models to achieve better performance than larger models for specialized tasks

**Cognitive Load as Model Selection Criterion:** Models with similar accuracy scores often showed different HPI values, revealing cognitive effort requirements. While Claude 3.5 achieved highest MMLU accuracy, GPT-4o recorded the best HPI score, demonstrating that cognitive load provides valuable insights beyond traditional metrics.

## Conclusions

HPT effectively assesses LLMs by focusing on cognitive task demands and using tailored prompting strategies, leading to improved performance across datasets. It provides insights into LLM problem-solving and suggests that dynamic prompting enhances evaluation methods. This approach aligns evaluation with human cognitive principles, paving the way for better benchmarks and in-context learning methods.
